# Supplementary material for: The effect of curative resection on fecal microbiota in patients with colorectal cancer: a prospective pilot study
Source: PubMed Central journal article supplement — Ann Surg Treat Res. 2020 Jun 29;99(1):44–51. doi: 10.4174/astr.2020.99.1.44 (PMC7332315; doi:10.4174/astr.2020.99.1.44), 2020-06-29
Supplement: astr-99-44-s001.pdf [file astr-99-44-s001.pdf]

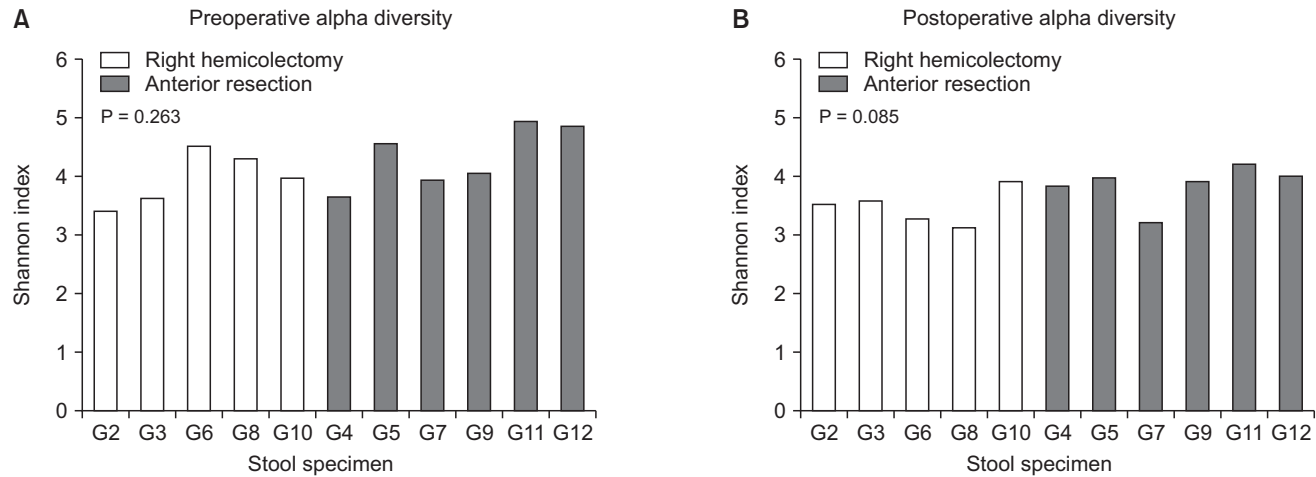

**Supplementary Fig. 1.** Alpha diversity according to the surgery type. (A) Preoperative alpha diversity. (B) Postoperative alpha diversity. No differences in postoperative alpha diversity were found between right hemicolectomy ( $3.48 \pm 0.31$ ) and anterior resection ( $3.86 \pm 0.34$ ) ( $P = 0.085$ ).
